# Supplementary material for: Improved charge separation and transport with l-aspartic acid derived carbon-doped g-C3N4 for efficient visible-light photocatalytic H2 production
Source: Royal Society of Chemistry journal article supplement (doi:10.1039/d4se01264j), 2024-01-01
Supplement: d4se01264j1.pdf [file d4se01264j1.pdf]

## Supporting Information

### Improved charge separation and transport with L-aspartic acid derived carbon-doped g-C<sub>3</sub>N<sub>4</sub> for efficient visible-light photocatalytic H<sub>2</sub> production

Ikram Ullah,<sup>a</sup> Ning Qin,<sup>a</sup> Pei Zhao,<sup>\*a</sup> Jing-Han Li,<sup>b</sup> Shuai Chen,<sup>b</sup> and An-Wu Xu<sup>\*b</sup>

<sup>a</sup>School of Energy and Power Engineering, Shandong University, Jinan 250061, P. R. China.

<sup>b</sup>Division of Nanomaterials and Chemistry, Hefei National Research Center for Physical Sciences at the Microscale, University of Science and Technology of China, Hefei 230026, P. R. China.

\*Corresponding Authors:

Pei Zhao; [pei.zhao@sdu.edu.cn](mailto:pei.zhao@sdu.edu.cn)

An-Wu Xu; [anwuxu@ustc.edu.cn](mailto:anwuxu@ustc.edu.cn)

## Experimental Part

### Synthesis of Photocatalysts

For preparation of CCN-*X* photocatalysts, 10 g of urea and different amounts of L-aspartic acid were dissolved in a mixed solution of 35 mL ethanol and 5 mL deionized water. The solution was heated in a water bath at 80 °C with continuous aging to remove the solvent. The obtained dry powder was then placed in a covered alumina crucible and annealed at 550 °C for 2 hours in air with a ramp rate of 5 °C min<sup>-1</sup>. After cooling to room temperature, CCN-*X* photocatalysts were obtained, where *X* represents the weight content of L-aspartic acid (*X* = 1, 4, 8, 12, and 16 mg). For a counterpart, pristine CN was synthesized by the calcination of 10 g urea under the same conditions, resulting in a light-yellow powder termed as CN.

### Characterization

TGA was conducted at NETZSCH TG 209 F1 Libra TGA analyzer with  $\alpha$ -Al<sub>2</sub>O<sub>3</sub> as the standard at a heating rate of 10 °C/min. XRD analysis was carried out employing a Rigaku TTR-III diffractometer (MXPAHF, Japan) with Cu K $\alpha$  radiation ( $\lambda = 1.54178 \text{ \AA}$ ) under an operating voltage of 40 kV and a current of 200 mA. FTIR spectroscopy was performed on KBr pellet samples utilizing a Nicolet Nexus 8700 with a spectral range of 500–400 cm<sup>-1</sup>. UV-Vis DRS of the samples were conducted using a Shimadzu 3700DUV spectrophotometer over a wavelength range of 200–800 nm with BaSO<sub>4</sub> as the reflectance reference. The spectra were converted to Tauc plots for calculating the optical bandgap through plotting  $(\alpha h\nu)^2$  versus  $h\nu$ , where  $\alpha$  indicates the absorption coefficient,  $h$  is Planck constant, and  $\nu$  is frequency of light. TEM, SEM, and HAADF-STEM and its corresponding EDS images were recorded using H-7650 HITACHI transmission electron microscope, GeminiSEM 450, and FEI Talos F200X field emission high-

resolution transmission electron microscope operated at 200 kV, respectively. XPS and VB-XPS were measured using a Thermo ESCALAB 250Xi X-ray photoelectron spectrometer with monochromatized Al K $\alpha$  radiation as the excitation sources with a pass energy of 30 eV. EPR spectra of the samples were obtained employing a Bruker JEOL JES-FA200 ESR spectrometer with a microwave power of 1mW and a sweep width ranging from 314.5 to 334.5 mT. PL measurements were carried out on a JY Fluorolog-3-Tau fluorescence spectrophotometer with an excitation wavelength of 370 nm. TRPL measurements were performed with LaserStrobe time-resolved spectrofluorometer (Photon Technology International (Canada) Inc.) using a USHIO xenon lamp and a 914-photomultiplier detection technique. Multipoint Brunauer-Emmett-Teller (BET) method was employed to achieve specific surface areas of the samples.

### **Photoelectrochemical Tests**

Photoelectrochemical measurements tests, including transient photocurrent response (TPR) and electrochemical impedance spectroscopy (EIS) were performed in a conventional three-electrode cell utilizing a CHI 760 electrochemical analyzer (Chenhua, Shanghai, China). The system consisted of Ag<sup>+</sup>/AgCl reference electrode, a Pt wire counter electrode, and an ITO glass working electrode. An aqueous solution of 0.5 M Na<sub>2</sub>SO<sub>4</sub> was used as the electrolyte with a 300 W xenon lamp as the light source. The working electrode was prepared by dispersing 1 mL of ethanol and 10  $\mu$ L Nafion solution via sonication. Then, 100  $\mu$ L of the solution was drop-cast onto an ITO glass with an expose area of  $\approx$ 1 cm<sup>2</sup> and followed by drying in a microwave oven at 80 °C for 2 hours. The TPR of the photocatalysts were measured employing an on/off switch method with a bias voltage of 0.5 V under visible-light illumination, while EIS Nyquist curves were achieved at a bias voltage of -0.2 V under continuous irradiation.

## Photocatalytic H<sub>2</sub> Evolution Tests

Photocatalytic H<sub>2</sub> production from water splitting was performed in a 500 mL Pyrex top-illumination reaction vessel equipped with a closed gas circulation and evacuation system (Perfect Light, Beijing, Labsolar-6A). In a conventional procedure, 50 mg of photocatalyst was dissolved in 100 mL aqueous solution containing 10 vol% TEOA. Subsequently, 1 wt% Pt was deposited onto the photocatalyst surface by photo deposition of H<sub>2</sub>PtCl<sub>6</sub>·6H<sub>2</sub>O as a cocatalyst. The suspension was repeatedly evacuated to remove air and other gases before irradiation with a 300 W xenon lamp with a long-pass filter of ( $\lambda \geq 420$  nm) as a visible-light source. The reaction solution was constantly aged, and the reaction temperature was maintained at 6 °C with a flow of cooling water during the photocatalytic reaction. H<sub>2</sub> evolution was measured by a gas chromatograph (GC1120, Shanghai Sunny Hengping Limited) utilizing a thermal conductivity detector and a 5 Å molecular sieve column with nitrogen as the carrier gas.

The AQE of CCN-8 photocatalyst with different monochromatic light illumination ( $\lambda = 420, 450, 500, \text{ and } 550 \text{ nm} \pm 5\text{nm}$ ) was calculated by the following equation:

$$AQE = \frac{\text{Number of produced } H_2 \text{ molecules} \times 2}{\text{incident photons number}} \times 100\%$$

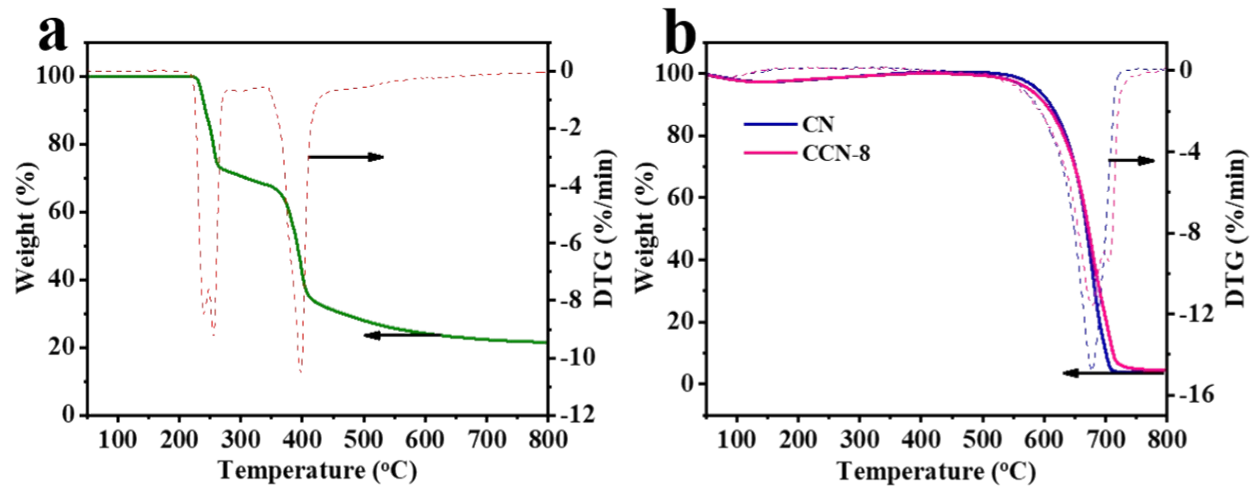

**Figure S1.** (a) TGA curve of LAA and (b) CN and CCN-8 photocatalysts with a rap rate of 10 °C min<sup>-1</sup>.

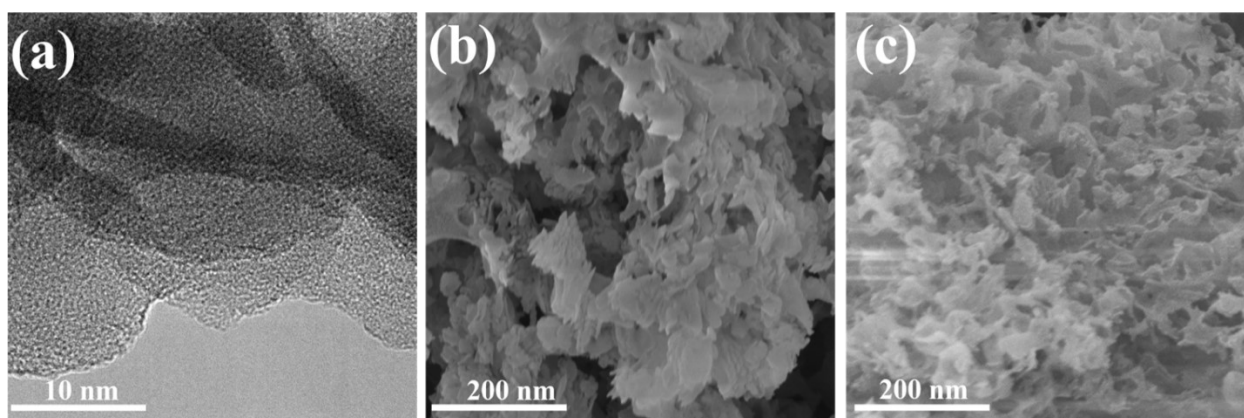

**Figure S2.** (a) HRTEM image of CCN-8 photocatalyst. The SEM images of (a) CN and (b) CCN-8 samples.

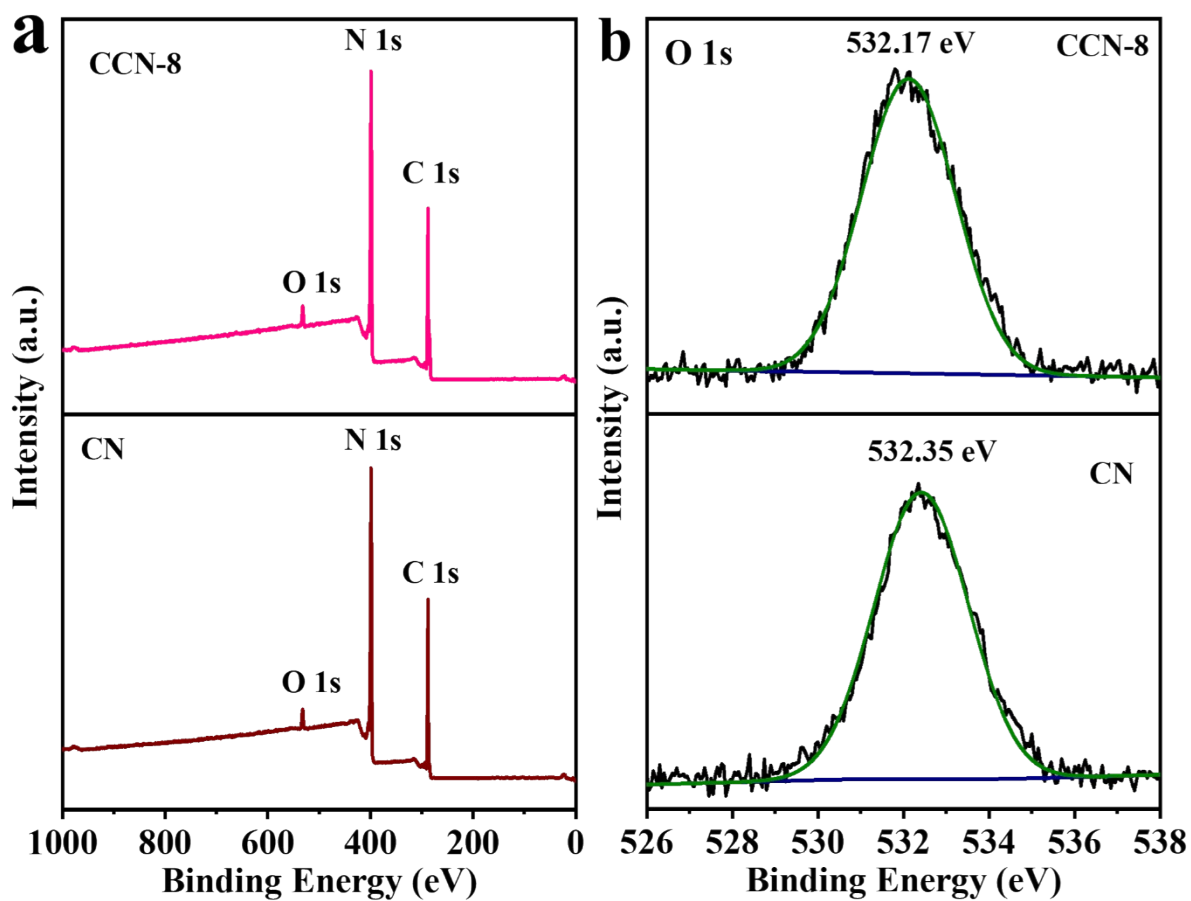

**Figure S3.** (a) XPS survey spectra and (b) high-resolution XPS spectra of O 1s for CN and CCN-8 samples.

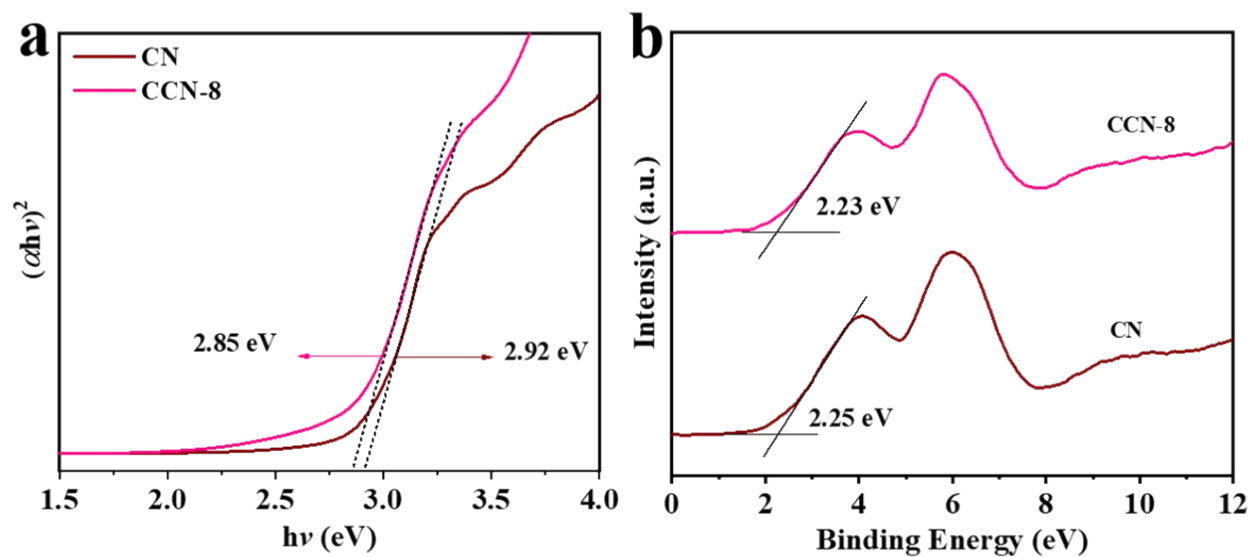

**Figure S4.** (a) Tauc curves and (b) VB-XPS spectra of CN and CCN-8 samples.

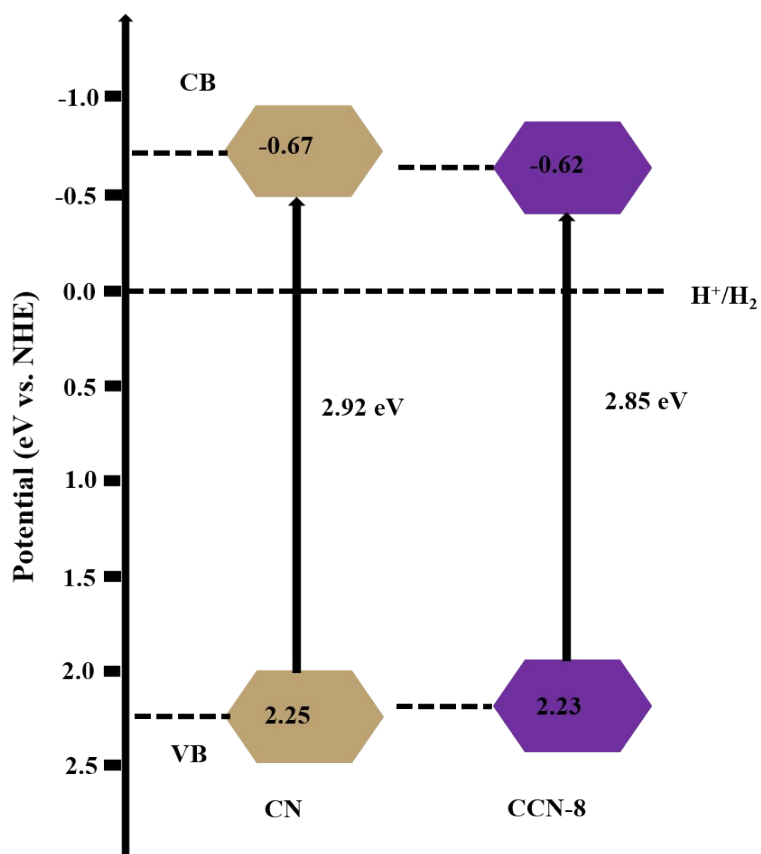

**Figure S5.** Electronic band configurations of CN and CCN-8 photocatalysts.

**Table S1** Kinetics analysis of emission decay for CN and CCN-8 samples.

| Photocatalysts | $\tau_1$ (ns) | Rel (%) | $\tau_2$ (ns) | Rel (%) | $\tau_3$ (ns) | Rel (%) | $\tau$ (ns) | $X^2$ |
|----------------|---------------|---------|---------------|---------|---------------|---------|-------------|-------|
| CN             | 2.68          | 45.77   | 12.83         | 34.32   | 0.54          | 19.99   | 1.78        | 1.19  |
| CCN-8          | 1.56          | 43.39   | 7.05          | 27.18   | 0.31          | 29.43   | 0.79        | 1.23  |

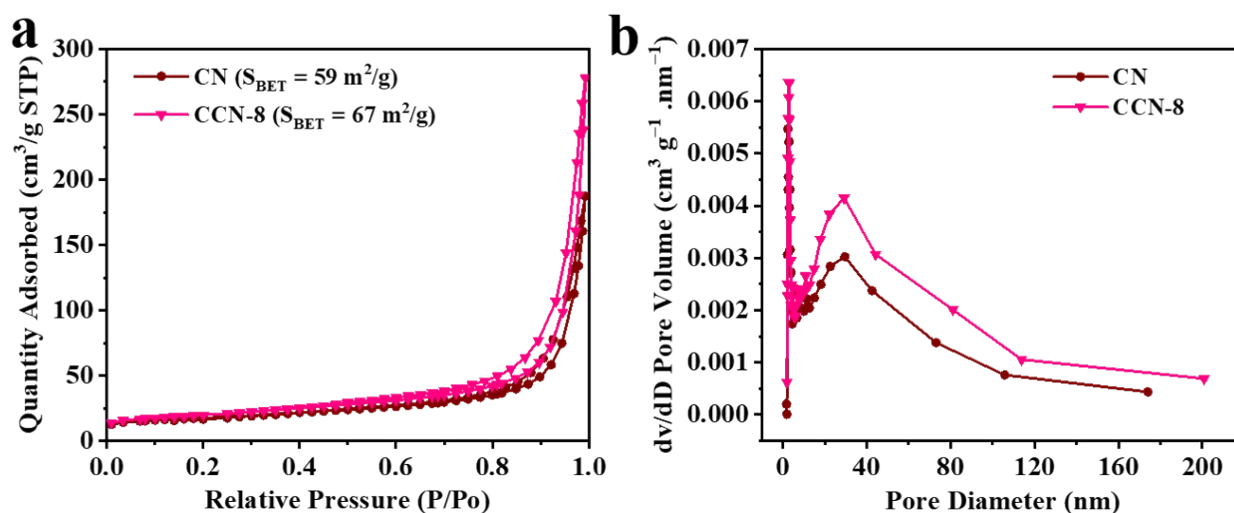

**Figure S6.** (a) Nitrogen adsorption/desorption isotherms and (b) pore size distribution curves of CN and CCN-8 photocatalysts.

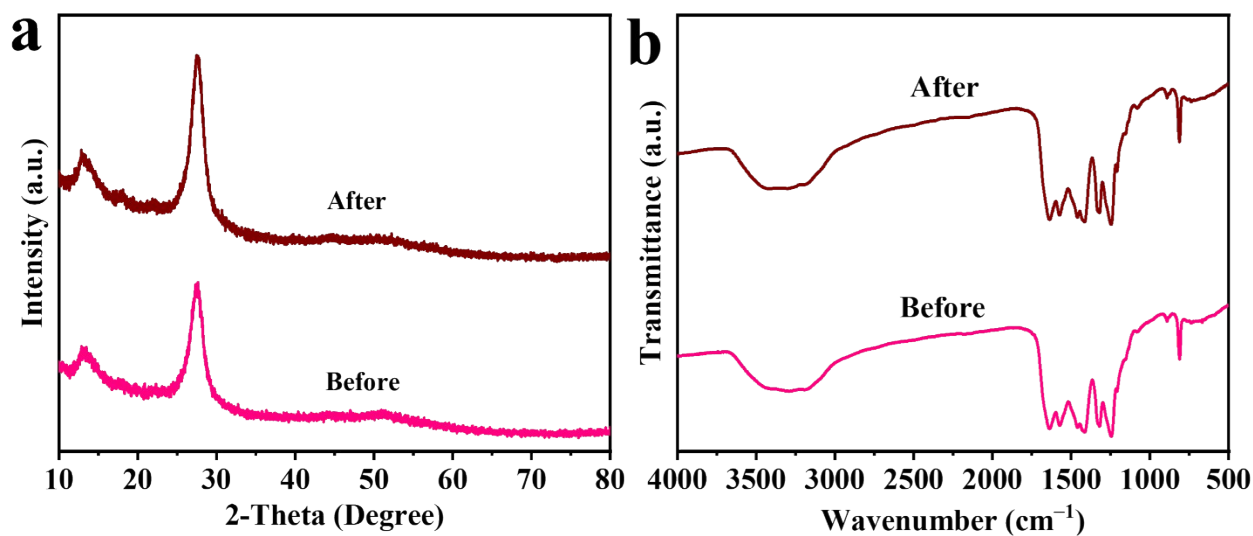

**Figure S7.** (a) XRD patterns and (b) FTIR spectra of CCN-8 before and after stability test.
